# Supplementary material
Source: PubMed Central journal article supplement (PMC8478782)
Supplement: NIHMS1714061-supplement-Supplemental_Table_1.pdf [file NIHMS1714061-supplement-Supplemental_Table_1.pdf]

Supplemental Table 1 – One rainy season: simulation results

| Model                               | Year 1  |          |       |              |
|-------------------------------------|---------|----------|-------|--------------|
|                                     | Bias    | Coverage | Power | Type 1 Error |
| <b>MM: PL (IL1)</b>                 | -0.0021 | 93.40    | 97.90 | 7.84         |
| <b>MM: PLKR (IL3)</b>               | -0.0021 | 93.40    | 97.10 | 5.83         |
| <b>MM: Laplace (IL2)</b>            | -0.0031 | 91.20    | 98.70 | 9.70         |
| <b>MM: AGQ - 10 (IL4)</b>           | -0.0031 | 91.20    | 98.70 | 9.70         |
| <b>GEE Model Based SE (IL5)</b>     | -0.0038 | 93.66    | 96.98 | 5.23         |
| <b>GEE Empirical SE (IL6)</b>       | -0.0038 | 90.74    | 97.78 | 7.85         |
| <b>GEE MBN Correction (IL7)</b>     | -0.0038 | 94.96    | 94.66 | 4.23         |
| <b>GEE FG Correction (IL8)</b>      | -0.0041 | 93.65    | 96.07 | 4.93         |
| <b>Unweighted t-test (CL1)</b>      | -0.0039 | 94.80    | 95.50 | 4.80         |
| <b>Size Weighted Gaussian (CL3)</b> | -0.0028 | 92.80    | 96.40 | 4.80         |
| <b>Variance Weighted (CL2)</b>      | -0.0036 | 94.70    | 95.70 | 5.00         |
| <b>Adjusted Residual (CL4)</b>      | 0.004   | 94.20    | 96.30 | 5.50         |

Supplemental Table 1: Bias, coverage, power and Type-I error rate for the single-period, fourteen cluster (one rainy season) analyses. The results reflect the analysis of the first of two simulated rainy seasons alone. A similar evaluation of the second rainy season yielded largely similar results and is not shown. These models were simulated from an assumed village random effect variance of 0.05.
