# Supplementary material
Source: PubMed Central journal article supplement (PMC8478782)
Supplement: NIHMS1714061-supplement-Supplementary_Material_-_Equations_and_Example_Code.pdf [file NIHMS1714061-supplement-Supplementary_Material_-_Equations_and_Example_Code.pdf]

## Supplementary Material –Equations and Example Code

### One Year - Individual Level (SAS)

Let  $Y_{hijk}$  be the number of malaria episodes for subjects  $k$  within village  $j$  within treatment  $i$  within year  $h$  and let  $\lambda_{hijk}$  be its expectation.

$\log(\lambda_{hijk}) = \alpha + \beta_1 X_i + \beta_2 X_{ijk} + u_{ij}$ , where  $X_i = 0$  (control) or  $X_i = 1$  (Ivermectin), and  $X_{ijk} = 0$  (female) or  $X_{ijk} = 1$  (male) and:

- $\alpha$  = Intercept
- $\beta_1$  = Log of the rate ratio treatment vs control
- $\beta_2$  = Log of the rate ratio males vs females
- $u_{ij}$  = Denotes the random village effect

- **IL1**

```
* Model 1 - PL no sample size correction ;
proc glimmix data=WORK.DF pconv= 1e-5 ;
class Village_code TRT(ref = "0") ;
Model Episodes = TRT / s dist=Poisson;
Random INT / subject= village_code;
```

- **IL2**

```
* Model 2 - Laplace;
proc glimmix data=work.DF method=LAPLACE pconv= 1e-5 ;
class Village_code TRT(ref = "0") ;
Model Episodes= TRT / s dist=Poisson;
Random INT / subject= village_code;
run;
```

- **IL3**

```
* Model 3 - Kenward Roger;
proc glimmix data=work.DF pconv= 1e-5 ;
class Village_code TRT(ref = "0") ;
Model Episodes = TRT/ s dist=Poisson ddfm=kenwardroger;
Random INT / subject= village_code;
```

- **IL4**

```
* Model 4 - Adaptive Gaussian Quadrature;
proc glimmix data=work.DF method=quad(qpoints = 10) pconv= 1e-5
;
class Village_code TRT(ref = "0") ;
Model Episodes = TRT/ s dist=Poisson ;
Random INT / subject= village_code;
```

- **IL5**

\* Model 5 - Model SE

```
proc glimmix data=work.DF pconv= 1e-5;
class Village_code TRT(ref = "0") ;
Model Episodes = TRT/ s dist=Poisson ;
Random residual / subject = village_code type=CS;
```

- **IL6**

\* Model 6 - Empirical SE

```
proc glimmix data=work.DF empirical pconv= 1e-5;
class Village_code TRT(ref = "0") ;
Model Episodes = TRT/ s dist=Poisson ;
Random residual / subject = village_code type=CS;
```

- **IL7**

\* Model 7 - MBN;

```
proc glimmix data=work.DF empirical = mbn pconv= 1e-5;
class Village_code TRT(ref = "0") ;
Model Episodes = TRT/ s dist=Poisson ;
Random residual / subject = village_code type=CS;
```

- **IL8**

\* Model 8 - FG;

```
proc glimmix data=work.DF empirical = firoeeq pconv= 1e-5;
class Village_code TRT(ref = "0") ;
Model Episodes = TRT/ s dist=Poisson ;
Random residual / subject = village_code type=CS;
```

## One year - Cluster Level (R)

Note: Generate cluster means (“mean”), the total number of episodes (“episodes”), and the number of subjects per cluster (“n”) first. DF refers to the imported data frame.

$$\bar{R}_{ij} = \frac{\sum Episodes_k}{m_j}$$

$Episodes_k$  = Number of episodes for subject k

$m_j$  = Number of subjects in cluster j

$\log(\bar{R}_{ij}) = \alpha + \beta_1 X_{ij}$ , where  $X_i = 0$  (control) or  $X_i = 1$  (Ivermectin) and:

$\alpha$  = Intercept

$\beta_1$  = Log of the rate ratio treatment vs control

- **CL1**

### Unweighted t-test

```
glm(mean ~ TRT, data = DF, family=gaussian(link="log"))
```

- **CL2**

### Variance Weighted

Note: Same model described above but weights have been generated using between and within cluster variation calculated with the ICC package in R<sup>1</sup>; weights calculated as previously described [16].

```
glm(mean ~ TRT, data = DF, weights = w,  
family=gaussian(link="log"))
```

- **CL3**

### Size Weighted Gaussian

Note: Same model as above but utilizes an offset where the outcome is the sum of episodes in a given cluster and the offset, m, accounts for the number of subjects in that given cluster.

```
glm(episodes ~ TRT + offset(log(m)), family=gaussian(link="log"),  
data = DF)
```

- **CL4**

### Adjusted Residual

Note: a GLM has been fit to individual level data and residuals are extracted (deviance by default in R)

Fit GLM without treatment effect:

```
glm(Episodes_Year1 ~ Male, data = DF, family = poisson)
```

Note: Extract residuals and summarize cluster level means, fit this model:

```
glm(mean.resids ~ TRT , data = DF)
```

## 2 Year Parallel – Individual Level Models (SAS)

### Time as Fixed Effect, Village as Random Effect

$\log(\lambda_{ijk}) = \alpha + \beta_1 X_i + \beta_2 X_{ijk} + \beta_3 X_{hijk} + u_{ij}$ , where  $X_i = 0$  (control) or  $X_i = 1$  (Ivermectin),  
 $X_{ijk} = 0$  (female) or  $X_{ijk} = 1$  (male) and  $X_{hijk} = 1$  (Year 1) or  $X_{hijk} = 2$  (Year 2) and:

$\alpha$  = Intercept  
 $\beta_1$  = Log of the rate ratio treatment vs control  
 $\beta_2$  = Log of the rate ratio males vs females  
 $\beta_3$  = Log of the rate ratio Year 1 vs Year 2  
 $u_{ij}$  = Denotes the random village effect

- **IL9**

```
* Model 1 - QL no sample size correction ;  
proc glimmix data=WORK.import pconv= 1e-5 ;  
class Village_code Treatment(ref = "0") YEAR Male(ref = "0");  
Model Episodes = Treatment Year Male/ s dist=Poisson;  
Random INT / subject= Village_code;
```

- **IL10**

```
* Model 2 - Laplace;  
proc glimmix data=WORK.import method=LAPLACE pconv= 1e-5 ;  
class Village_code Treatment(ref = "0") YEAR Male(ref = "0");  
Model Episodes = Treatment Year Male/ s dist=Poisson;  
Random INT / subject= Village_code;
```

- **IL11**

```
* Model 3 - Kenward Roger;  
proc glimmix data=WORK.import pconv= 1e-5 ;  
class Village_code Treatment(ref = "0") YEAR Male(ref = "0");  
Model Episodes = Treatment Year Male/ s dist=Poisson ddfm=kr;  
Random INT / subject= Village_code;
```

- **IL12**

```
* Model 4 - Quad;  
proc glimmix data=WORK.import method=quad(qpoints = 10) pconv=  
1e-5 ;  
class Village_code Treatment(ref = "0") YEAR Male(ref = "0");  
Model Episodes = Treatment Year Male/ s dist=Poisson;  
Random INT / subject= Village_code;
```

- **IL13**

```
* Model 5 - Model SE
```

```
proc glimmix data=WORK.import pconv= 1e-5;
class Village_code Treatment(ref = "0") YEAR Male(ref = "0");
Model Episodes = Treatment Year Male/ s dist=Poisson;
Random residual / subject= Village_code type=CS;
```

- IL14

```
* Model 6 - Empirical SE;
proc glimmix data=WORK.import empirical pconv= 1e-5;
class Village_code Treatment(ref = "0") YEAR Male(ref = "0");
Model Episodes = Treatment Year Male/ s dist=Poisson;
Random residual / subject= Village_code type=CS;
```

- IL15

```
* Model 7 - MBN;
proc glimmix data=WORK.import empirical = mbn pconv= 1e-5;
class Village_code Treatment(ref = "0") YEAR Male(ref = "0");
Model Episodes = Treatment Year Male/ s dist=Poisson;
Random residual / subject= Village_code type=CS;
```

- IL16

```
* Model 8 - FG;
proc glimmix data=WORK.import empirical = firoeeq pconv= 1e-5;
class Village_code Treatment(ref = "0") YEAR Male(ref = "0");
Model Episodes = Treatment Year Male/ s dist=Poisson;
Random residual / subject= Village_code type=CS;
```

### Village as Random Effect, Cluster Period as Random Effect

$\log(\lambda_{ijk}) = \alpha + \beta_1 X_i + \beta_2 X_{ijk} + u_{ij} + v_{hij}$ , where  $X_i = 0$  (control) or  $X_i = 1$  (Ivermectin),  
 $X_{ijk} = 0$  (female) or  $X_{ijk} = 1$  (male) and:

$\alpha$  = Intercept  
 $\beta_1$  = Log of the rate ratio treatment vs control  
 $\beta_2$  = Log of the rate ratio males vs females  
 $u_{ij}$  = Denotes the random village effect  
 $v_{hij}$  = Denotes the random village-period effect

- IL17, IL18 (Maximum Likelihood mixed-effects models only)

*Same as proc statements as above, but with the following change:*

```
class Village_code Treatment(ref = "0") YEAR;
Model Episodes = Treatment Male/ s dist=Poisson;
Random INT / subject= village_code;
Random INT / subject= YEAR(village_code);
```

## 2 Year Parallel Cluster Level Models (R)

$$\bar{R}_{ij} = \frac{\sum Episodes_k}{m_j}$$

$Episodes_k$  = Number of episodes for subject k

$m_j$  = Number of subjects in cluster j

$\log(\bar{R}_{ij}) = \alpha + \beta_1 X_{ij}$ , where  $X_i = 0$  (control) or  $X_i = 1$  (Ivermectin) and:

$\alpha$  = Intercept

$\beta_1$  = Log of the rate ratio treatment vs control

- **CL5**

### Unweighted t-test – Summarize over both years to get 14 means

```
glm(Mean ~ TRT, data = DF)
```

- **CL6**

### Adjusted Residual

Note: Same model as above, but year is a covariate and the GLM is fit on individual data without the treatment effect.

Fit GLM without treatment effect:

```
glm(Episodes ~ Male + Year, data = ., family = poisson)
```

Extract residuals and summarize cluster level means, fit this model:

```
glm(mean.resids ~ TRT)
```

- **CL7**

### Treatment + Time – Summarize cluster periods to get 28 means

Note: Same as unweighted t-test, but each cluster period has its own mean

```
glm(Mean ~ TRT + Year, data = DF, family=gaussian(link="log"))
```

- **CL8**

Weighted Treatment + Time – Summarize cluster periods to get 28 means

Note: Weights calculated by inverse weighting size as described previously [19]

```
glm(Mean ~ TRT + Year, data = DF, weights = w,  
family=gaussian(link="log")), data = DF)
```



## 2 Year Cross-over – Individual Level Models (SAS)

Same as above, but with the following change: where “Treatment” refers to a variable indicating if ivermectin was received or not for that particular year.

### Village as Fixed Effect, Cluster Period as Random Effect

- **IL19 – 26**

$\log(\lambda_{ijk}) = \alpha + \beta_1 X_{hi} + \beta_2 X_{ijk} + \beta_3 X_j + v_{hij}$ , where  $X_{hi} = 0$  (control) or  $X_i = 1$  (Ivermectin),  $X_{ijk} = 0$  (female) or  $X_{ijk} = 1$  (male) and  $X_j = 1 - 14$  (Village 1 - 14) and:

- $\alpha$  = Intercept
- $\beta_1$  = Log of the rate ratio treatment vs control
- $\beta_2$  = Log of the rate ratio males vs females
- $\beta_3$  = Log of the rate ratio for each cluster versus cluster reference
- $v_{hij}$  = Denotes the random village-period effect

```
class Village_code Treatment(ref = "0") YEAR Male(ref = "0");
Model Episodes = Treatment Village_code Male/ s dist=Poisson;
Random INT / subject= YEAR(village_code);
```

### Village as Random Effect, Cluster Period as Random Effect

- **IL27 and 28**

$\log(\lambda_{ijk}) = \alpha + \beta_1 X_{hi} + \beta_2 X_{ijk} + u_{ij} + v_{hij}$ , where  $X_{hi} = 0$  (control) or  $X_i = 1$  (Ivermectin),  $X_{ijk} = 0$  (female) or  $X_{ijk} = 1$  (male) and:

- $\alpha$  = Intercept
- $\beta_1$  = Log of the rate ratio treatment vs control
- $\beta_2$  = Log of the rate ratio males vs females
- $u_{ij}$  = Denotes the random village effect
- $v_{hij}$  = Denotes the random village-period effect

```
class Village_code Treatment(ref = "0") YEAR;
Model Episodes = Treatment Male/ s dist=Poisson;
Random INT / subject= village_code;
Random INT / subject= YEAR(village_code);
```

## 2 Year Cross-over – Cluster Level Models (R)

- **CL9**

Treatment + Time + Cluster – Summarize cluster periods to get 28 means

```
glm(Mean ~ TRT + Year + as.factor(Village_code), data = DF,  
family=gaussian(link="log"))
```

Note: same as previous models but a fixed effect for village is applied.

## Simulate Data

The R code below shows how to simulate multiple years of data while maintaining the same within village random effect across years. The function was used create a 14-cluster data set but allow for different village random effect variances; here, a village random effect variance of 0.10 was used. See the simstudy R package:

Keith Goldfeld. simstudy: Simulation of Study Data. 2019. <https://CRAN.R-project.org/package=simstudy> (28 July 2020, date last accessed)

```
library(simstudy)

set.seed(2007)

# Control Rate = 1.088
# Treatment Rate = 0.619
# Rate Ratio
RR <- 0.619/1.088
RR # 0.5689338

## [1] 0.5689338

# Determine the effect for the poisson model
# Control: 1.088 = exp(x)
log(1.088) # 0.08434115

## [1] 0.08434115

# Treatment: 0.619 = exp(0.08434115 + X)
log(0.619) - 0.08434115

## [1] -0.5639912

# -0.5639912 #

# Check
exp(0.08434115 + -0.5639912) #0.619

## [1] 0.619

exp(0.08434115) # 1.088

## [1] 1.088

glmerFUN <- function(VillageRE) {
  Form = "0.0843 + -0.5639912*TRT + 0.13*Male + VillageRE"
  Form2 = "0.0843 + -0.5639912*CRX0_TRT_Year2 + 0.13*Male + VillageRE"
  Form3 = "0.0843 + -0.5639912*TRT + -0.1053605 + 0.13*Male + VillageRE"
  Form4 = "0.0843 + -0.5639912*CRX0_TRT_Year2 + -0.1053605 + 0.13*Male + Vill
ageRE"
```

```

Form5 = "0.0843 + -0*TRT + 0.13*Male + VillageRE"
Form6 = "0.0843 + -0*TRT + -0.1053605 + 0.13*Male +VillageRE"
Form7 = "0.0843 + -0*CRXO_TRT_Year2 + -0.1053605 + 0.13*Male + VillageRE"

gen.village <- defData(varname = "VillageRE", dist = "normal", formula = 0,
variance = VillageRE, id = "Village_code")
gen.village <- defData(gen.village, varname = "nSubjects", formula = "rep(c
(70,88,127,112,98,81,123,98,118,37,95,83,109,78), each = 1)")
gen.village <- defData(gen.village, varname = "TRT", formula = "rep(c(1,0),
each = 7)")
gen.village <- defData(gen.village, varname = "CRXO_TRT_Year2", formula = "
rep(c(0,1), each = 7)")
dtVillage <- genData(14, gen.village)

gen.Subject <- defDataAdd(varname = "Male", dist = "binary", formula = 0.5)
gen.Subject <- defDataAdd(gen.Subject, varname = "Episodes_Year1", dist = "
poisson", formula = Form , link = "log")
gen.Subject <- defDataAdd(gen.Subject, varname = "Episodes_Year2_10", dist
= "poisson", formula = Form3 , link = "log")
gen.Subject <- defDataAdd(gen.Subject, varname = "Episodes_Year2_CRXO_10",
dist = "poisson", formula = Form4 , link = "log")
gen.Subject <- defDataAdd(gen.Subject, varname = "Episodes_Year1_Null", dis
t = "poisson", formula = Form5 , link = "log")
gen.Subject <- defDataAdd(gen.Subject, varname = "Episodes_Year2_10_Null",
dist = "poisson", formula = Form6 , link = "log")
gen.Subject <- defDataAdd(gen.Subject, varname = "Episodes_Year2_CRXO_10_Nu
ll", dist = "poisson", formula = Form7 , link = "log")

dtSubject <- genCluster(dtVillage, cLevelVar = "Village_code", numIndsVar =
"nSubjects", level1ID = "Subject")

dtSubject <- addColumns(gen.Subject, dtSubject)
}

SIM2 <- do.call("rbind.data.frame", replicate(1000, glmerFUN(VillageRE = 0.10
), simplify = FALSE))

rep <- 1000
SIM2$i <- NA
SIM2$i[SIM2$Subject == 1] <- rep(c(1:rep), each = 1)
SIM2Final <- SIM2 %>% fill(i)

```

## References

1. Wolak ME, Fairbairn DJ and Paulsen YR. Guidelines for estimating repeatability. *Methods in Ecology and Evolution* 2012; 3: 129-137.

### Previously cited in main text:

16. Leyrat C, Morgan KE, Leurent B, et al. Cluster randomized trials with a small number of clusters: which analyses should be used? *International journal of epidemiology* 2018; 47: 321-331.
19. Turner RM, White IR, Croudace T, et al. Analysis of cluster randomized cross-over trial data: a comparison of methods. *Stat Med* 2007; 26: 274-289.
